# Supplementary material
Source: PubMed Central journal article supplement (PMC4165456)
Supplement: ar5002186_si_001.pdf [file ar5002186_si_001.pdf]

Supporting information for

## Explicit Polarization: A Quantum Mechanical Framework for Developing Next Generation Force Fields

Jiali Gao,<sup>\*,1,2</sup> Donald G. Truhlar,<sup>2</sup> Yingjie Wang,<sup>2</sup> Michael J. M. Mazack,<sup>2</sup>  
Patrick Löffler,<sup>2</sup> Makenzie R. Provorse,<sup>2</sup> and Pavel Rehak<sup>2</sup>

1. Theoretical Chemistry Institute  
State Key Laboratory of Theoretical and Computational Chemistry  
Jilin University, Changchun, Jilin Province 130028, P. R. China

and

2. Department of Chemistry and Supercomputing Institute  
University of Minnesota, Minneapolis, MN 55455, United States

Email: [gao@jialigao.org](mailto:gao@jialigao.org)

Table S1. Computed interaction energies for large water clusters using X-Pol, two-body and three-body variational (VX-Pol, VMB2, VMB3) and embedding (X-Pol, MB2, MB3) many-body expansion with the semiempirical PMO model with and without periodic boundary conditions (p).

|                                     | Full QM | VX-Pol  | VMB2    | VMB3   | X-Pol   | MB2     | MB3    |
|-------------------------------------|---------|---------|---------|--------|---------|---------|--------|
| (H <sub>2</sub> O) <sub>37</sub>    | -210.7  | -135.5  | -208.9  | -210.7 | -117.4  | -192.3  | -209.8 |
| (H <sub>2</sub> O) <sub>65</sub>    | -735.5  | -432.6  | -720.9  | -734.7 | -344.8  | -602.6  | -722.3 |
| p-(H <sub>2</sub> O) <sub>100</sub> | -899.3  | -905.3  | -895.4  | -898.6 | -724.5  | -654.2  | -886.2 |
| p-(H <sub>2</sub> O) <sub>267</sub> | -2825.0 | -1570.0 | -2811.3 |        | -1332.2 | -2464.9 |        |

3. Coordinates for the cluster of 65 water molecules used in this article.

|     |   |          |          |          |
|-----|---|----------|----------|----------|
| 1.  | O | -1.78153 | -1.26701 | 5.88987  |
| 2.  | H | -2.64057 | -1.68672 | 5.83396  |
| 3.  | H | -1.10285 | -1.82937 | 5.51798  |
| 4.  | O | -2.50584 | -0.74727 | -1.32017 |
| 5.  | H | -3.26103 | -0.48566 | -0.78692 |
| 6.  | H | -2.78343 | -1.06928 | -2.19172 |
| 7.  | O | -5.85922 | 1.35457  | -3.48622 |
| 8.  | H | -6.49362 | 1.68132  | -4.11015 |
| 9.  | H | -5.85534 | 0.39369  | -3.45516 |
| 10. | O | 5.66132  | 1.05309  | -2.36212 |
| 11. | H | 5.65547  | 0.62006  | -1.49934 |
| 12. | H | 6.52212  | 1.40337  | -2.56070 |
| 13. | O | -2.13341 | 3.38261  | 5.36163  |
| 14. | H | -1.53066 | 2.63807  | 5.56499  |
| 15. | H | -1.70126 | 4.22411  | 5.43045  |
| 16. | O | 3.22650  | -5.70475 | -1.51737 |
| 17. | H | 2.72999  | -6.50422 | -1.64737 |
| 18. | H | 3.31376  | -5.19798 | -2.33098 |
| 19. | O | -0.87334 | 3.26970  | -5.65325 |
| 20. | H | -0.12983 | 2.65716  | -5.57834 |
| 21. | H | -1.67591 | 2.83250  | -5.89823 |
| 22. | O | 5.54607  | -0.92825 | 2.84200  |
| 23. | H | 5.97633  | -0.08818 | 2.98747  |
| 24. | H | 5.00180  | -1.21859 | 3.57305  |
| 25. | O | -0.07654 | 3.74417  | -1.96789 |
| 26. | H | -0.52053 | 3.05207  | -2.47446 |
| 27. | H | 0.26682  | 3.38067  | -1.14099 |
| 28. | O | 3.57199  | -4.84561 | 1.01657  |
| 29. | H | 3.36462  | -5.16790 | 0.13710  |
| 30. | H | 3.94295  | -5.54196 | 1.58201  |
| 31. | O | -2.23132 | 5.13573  | 1.53196  |
| 32. | H | -2.73016 | 5.83043  | 1.95115  |
| 33. | H | -1.63824 | 5.48298  | 0.83078  |
| 34. | O | 5.19112  | -2.25890 | -3.87680 |
| 35. | H | 5.66567  | -1.87581 | -4.60392 |
| 36. | H | 5.70417  | -2.23127 | -3.05760 |
| 37. | O | 1.03307  | 4.17738  | 5.21751  |
| 38. | H | 1.61609  | 3.40116  | 5.08866  |
| 39. | H | 1.05769  | 4.47723  | 6.11977  |
| 40. | O | -4.03461 | -2.81564 | 5.17244  |
| 41. | H | -4.07482 | -3.74767 | 5.32072  |
| 42. | H | -4.47788 | -2.57859 | 4.35748  |
| 43. | O | 4.24638  | 3.09109  | -4.04650 |
| 44. | H | 4.29481  | 2.17074  | -3.79971 |
| 45. | H | 4.51302  | 3.25013  | -4.94279 |

|     |   |          |          |          |
|-----|---|----------|----------|----------|
| 46. | O | -4.06736 | -0.18703 | 2.69577  |
| 47. | H | -3.23129 | -0.66633 | 2.72032  |
| 48. | H | -4.08204 | 0.56905  | 3.28672  |
| 49. | O | -0.74809 | 5.89495  | -0.43746 |
| 50. | H | -0.72757 | 5.26380  | -1.16501 |
| 51. | H | -0.13597 | 6.60989  | -0.56437 |
| 52. | O | -3.20157 | -5.65832 | -2.37308 |
| 53. | H | -3.51289 | -4.99343 | -1.72626 |
| 54. | H | -3.87305 | -6.30604 | -2.56740 |
| 55. | O | 4.28678  | -2.46278 | -0.05331 |
| 56. | H | 5.02339  | -2.70624 | -0.61303 |
| 57. | H | 4.06750  | -3.15851 | 0.57226  |
| 58. | O | -0.72218 | 1.20810  | 5.74189  |
| 59. | H | -1.20551 | 0.39557  | 5.92516  |
| 60. | H | 0.02464  | 1.02640  | 5.16942  |
| 61. | O | -1.64838 | 1.63233  | -2.92101 |
| 62. | H | -1.68107 | 0.95357  | -2.25196 |
| 63. | H | -2.44776 | 2.18450  | -2.88632 |
| 64. | O | -4.14419 | -3.83616 | -0.73770 |
| 65. | H | -4.73311 | -3.18983 | -1.12214 |
| 66. | H | -4.21493 | -3.78937 | 0.21921  |
| 67. | O | 4.69733  | 3.78439  | -1.25369 |
| 68. | H | 4.44010  | 4.48910  | -1.85195 |
| 69. | H | 4.87529  | 2.98529  | -1.73808 |
| 70. | O | 4.58053  | 3.38604  | 3.07504  |
| 71. | H | 4.01247  | 3.42839  | 2.27393  |
| 72. | H | 4.50732  | 4.22957  | 3.52268  |
| 73. | O | 2.83844  | 5.60000  | 3.44644  |
| 74. | H | 2.66434  | 5.37935  | 2.53209  |
| 75. | H | 2.12912  | 5.31837  | 4.02007  |
| 76. | O | 0.73884  | 0.66491  | 3.23444  |
| 77. | H | 1.18544  | 0.12253  | 2.57782  |
| 78. | H | 0.06245  | 1.23016  | 2.86525  |
| 79. | O | 2.36937  | -4.21112 | 3.56181  |
| 80. | H | 2.48541  | -4.20674 | 2.61023  |
| 81. | H | 2.13318  | -5.10097 | 3.82857  |
| 82. | O | -0.62936 | 3.16908  | 2.67674  |
| 83. | H | -0.26570 | 3.44070  | 3.51618  |
| 84. | H | -1.33283 | 3.76102  | 2.39234  |
| 85. | O | 3.29737  | -1.76033 | 4.31299  |
| 86. | H | 3.00054  | -2.67784 | 4.25806  |
| 87. | H | 2.74988  | -1.21508 | 4.87108  |
| 88. | O | -1.69767 | 0.11280  | -5.20124 |
| 89. | H | -1.54791 | 0.77718  | -4.51787 |
| 90. | H | -2.42008 | -0.45282 | -4.93217 |
| 91. | O | -6.21107 | -1.46011 | -3.47835 |
| 92. | H | -6.38173 | -1.72708 | -2.55720 |
| 93. | H | -6.85979 | -1.78646 | -4.08889 |

|      |   |          |          |          |
|------|---|----------|----------|----------|
| 94.  | O | -4.22272 | 2.04999  | 4.45712  |
| 95.  | H | -4.52842 | 1.67779  | 5.27627  |
| 96.  | H | -3.45142 | 2.62777  | 4.63085  |
| 97.  | O | 0.59246  | -1.32366 | -5.03331 |
| 98.  | H | 1.34472  | -0.74640 | -4.91702 |
| 99.  | H | -0.21498 | -0.83810 | -5.26097 |
| 100. | O | -0.67130 | -3.24771 | -0.99612 |
| 101. | H | -1.50516 | -2.78249 | -1.01968 |
| 102. | H | -0.16289 | -3.15857 | -1.81887 |
| 103. | O | -5.63083 | 3.05130  | 2.32570  |
| 104. | H | -5.58467 | 3.98801  | 2.46806  |
| 105. | H | -5.29324 | 2.57511  | 3.09869  |
| 106. | O | 6.09211  | -0.19162 | 0.11999  |
| 107. | H | 5.52946  | -0.83238 | 0.55861  |
| 108. | H | 6.32148  | 0.49349  | 0.76170  |
| 109. | O | 2.19772  | -1.33950 | -1.39592 |
| 110. | H | 1.74711  | -1.99418 | -1.94103 |
| 111. | H | 2.94264  | -1.71040 | -0.90745 |
| 112. | O | 0.04676  | 0.03056  | -0.28193 |
| 113. | H | 0.79270  | -0.46385 | -0.63288 |
| 114. | H | -0.80551 | -0.29520 | -0.57423 |
| 115. | O | 0.91196  | -3.04858 | -3.12572 |
| 116. | H | 1.61307  | -3.65266 | -3.36314 |
| 117. | H | 0.67390  | -2.45187 | -3.87278 |
| 118. | O | 3.12671  | 3.63913  | 0.93769  |
| 119. | H | 2.29862  | 3.20327  | 0.70669  |
| 120. | H | 3.71154  | 3.75859  | 0.17560  |
| 121. | O | -0.27345 | -3.19202 | 4.40024  |
| 122. | H | -0.21328 | -4.04490 | 4.80994  |
| 123. | H | 0.36368  | -3.13025 | 3.68528  |
| 124. | O | -1.06046 | -5.40777 | 1.94806  |
| 125. | H | -1.14980 | -5.75158 | 1.04760  |
| 126. | H | -1.03165 | -4.46015 | 1.96398  |
| 127. | O | 1.07088  | -6.60473 | 3.07118  |
| 128. | H | 1.04804  | -7.52852 | 2.85502  |
| 129. | H | 0.29795  | -6.14874 | 2.69898  |
| 130. | O | 0.79504  | 5.03311  | -4.30938 |
| 131. | H | 0.48193  | 4.74138  | -3.45192 |
| 132. | H | 0.20318  | 4.71980  | -4.99508 |
| 133. | O | -2.05852 | -2.01217 | 2.61591  |
| 134. | H | -1.26965 | -1.96836 | 2.05986  |
| 135. | H | -1.78491 | -2.33158 | 3.47606  |
| 136. | O | 3.35482  | -4.26219 | -3.92513 |
| 137. | H | 3.96541  | -3.52086 | -3.94283 |
| 138. | H | 3.27538  | -4.68088 | -4.79559 |
| 139. | O | 2.50638  | -0.90543 | 1.83361  |
| 140. | H | 3.00314  | -0.63619 | 1.07687  |
| 141. | H | 3.07254  | -1.16083 | 2.57416  |

|      |   |          |          |          |
|------|---|----------|----------|----------|
| 142. | O | -6.37142 | -2.06209 | -0.91588 |
| 143. | H | -7.03601 | -2.50793 | -0.39677 |
| 144. | H | -5.90097 | -1.35393 | -0.42943 |
| 145. | O | 6.71970  | -2.36527 | -1.57187 |
| 146. | H | 7.37159  | -3.04482 | -1.43418 |
| 147. | H | 6.84684  | -1.58566 | -1.01964 |
| 148. | O | 1.56919  | 2.19906  | -5.14118 |
| 149. | H | 1.87479  | 3.02922  | -4.80299 |
| 150. | H | 1.99667  | 1.46167  | -4.68802 |
| 151. | O | -0.90790 | -6.01570 | -0.72471 |
| 152. | H | -0.63261 | -5.10083 | -0.85653 |
| 153. | H | -1.63151 | -6.20971 | -1.31499 |
| 154. | O | 2.58893  | 2.13033  | 4.61724  |
| 155. | H | 3.40250  | 2.40278  | 4.18579  |
| 156. | H | 2.04632  | 1.54633  | 4.07937  |
| 157. | O | -3.39936 | -1.70179 | -3.71837 |
| 158. | H | -4.34712 | -1.68738 | -3.78466 |
| 159. | H | -2.99282 | -2.53568 | -4.03042 |
| 160. | O | 2.81675  | 5.58390  | -2.40494 |
| 161. | H | 2.47579  | 5.63489  | -3.30133 |
| 162. | H | 2.37342  | 4.88193  | -1.94776 |
| 163. | O | 0.67810  | 2.52592  | 0.35570  |
| 164. | H | 0.22926  | 2.81580  | 1.15708  |
| 165. | H | 0.46098  | 1.60448  | 0.13043  |
| 166. | O | -5.02681 | -0.13898 | 0.17850  |
| 167. | H | -4.68265 | -0.09900 | 1.08404  |
| 168. | H | -5.51629 | 0.66498  | -0.06236 |
| 169. | O | -3.66734 | 3.14942  | 0.17320  |
| 170. | H | -3.11316 | 3.83309  | 0.54761  |
| 171. | H | -4.22029 | 2.75745  | 0.84557  |
| 172. | O | 6.52746  | 1.70948  | 2.26089  |
| 173. | H | 5.84715  | 2.32347  | 2.59515  |
| 174. | H | 7.37848  | 2.13147  | 2.22919  |
| 175. | O | -6.50726 | 2.08023  | -0.17339 |
| 176. | H | -6.44235 | 2.52449  | 0.66977  |
| 177. | H | -6.33092 | 2.65334  | -0.91810 |
| 178. | O | 0.33330  | -2.59591 | 1.49372  |
| 179. | H | 1.08734  | -1.99756 | 1.55582  |
| 180. | H | 0.14893  | -2.86316 | 0.58818  |
| 181. | O | -3.89540 | 2.98985  | -2.49545 |
| 182. | H | -4.61964 | 2.46240  | -2.84545 |
| 183. | H | -3.86322 | 3.05122  | -1.52708 |
| 184. | O | -2.90830 | 5.54633  | -3.33463 |
| 185. | H | -3.30649 | 4.70245  | -3.10829 |
| 186. | H | -2.10778 | 5.42929  | -3.82778 |
| 187. | O | -4.50348 | -3.02858 | 1.96017  |
| 188. | H | -3.57904 | -2.81372 | 2.14070  |
| 189. | H | -5.01794 | -2.22838 | 1.99627  |

|      |   |          |          |          |
|------|---|----------|----------|----------|
| 190. | O | 2.87216  | 0.00597  | -3.75783 |
| 191. | H | 3.71385  | -0.42240 | -3.88422 |
| 192. | H | 2.56508  | -0.17683 | -2.86386 |
| 193. | O | -2.36959 | -4.07177 | -4.43163 |
| 194. | H | -2.53877 | -4.73978 | -3.74852 |
| 195. | H | -1.71316 | -4.31454 | -5.05910 |
